# Supplementary figures and images for: Comparative Genomics across Three Ensifer Species Using a New Complete Genome Sequence of the Medicago Symbiont Sinorhizobium (Ensifer) meliloti WSM1022
Source: MDPI journal article supplement (doi:10.3390/microorganisms9122428), 2021-11-25

A

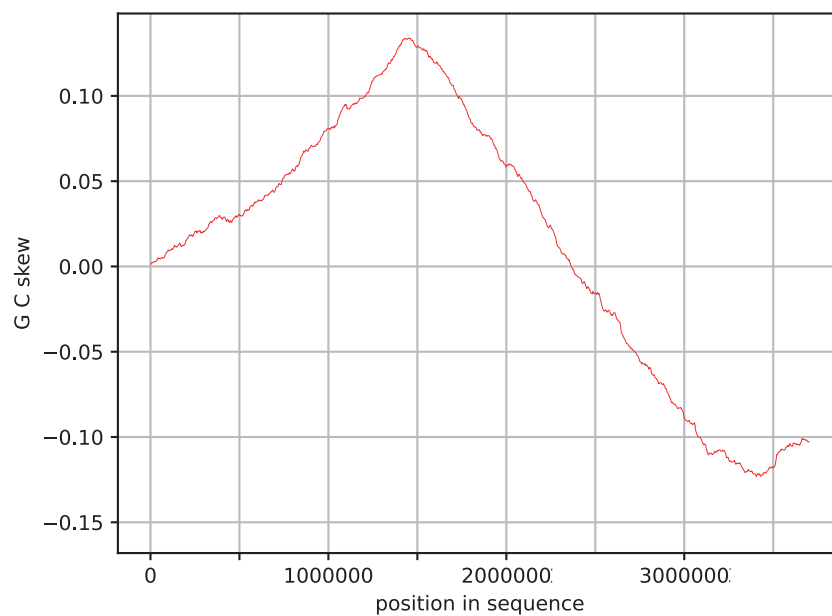

B

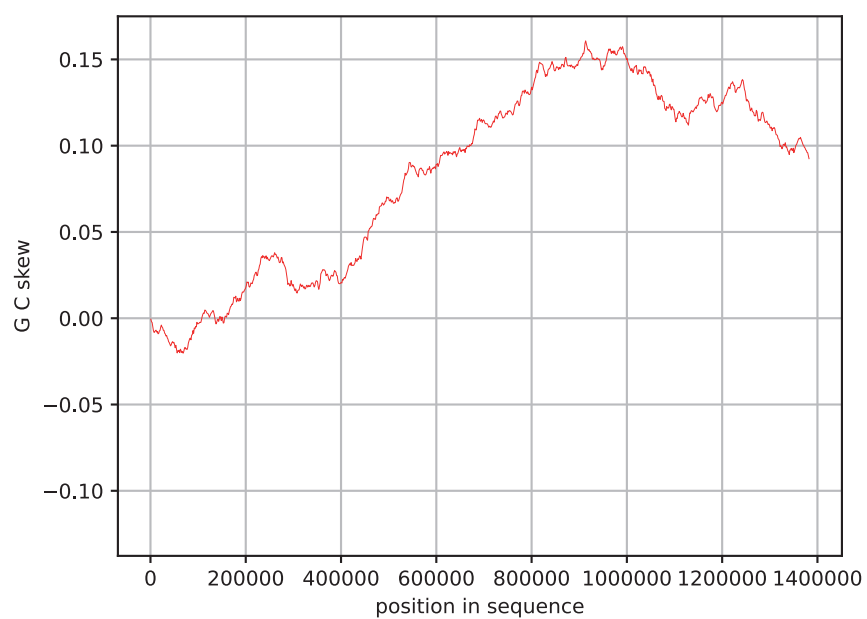

C

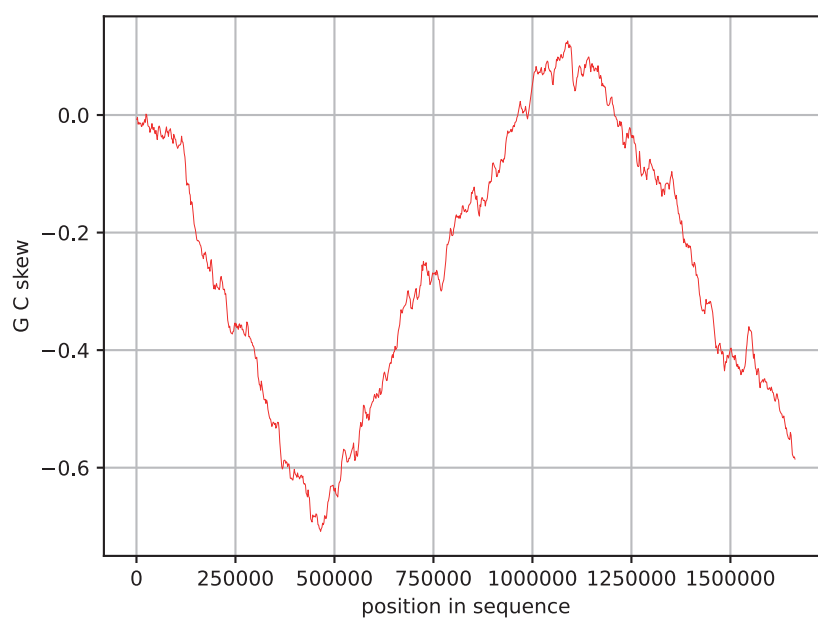

Supplement: s1 [file s1]

A

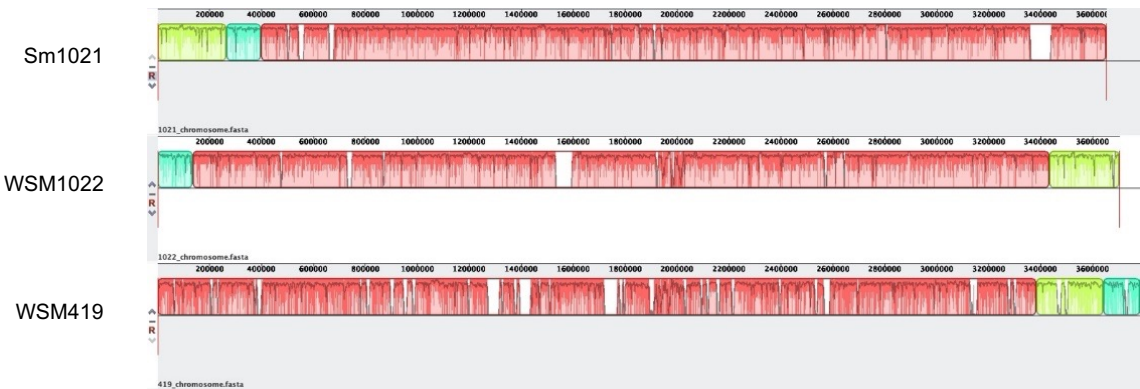

B

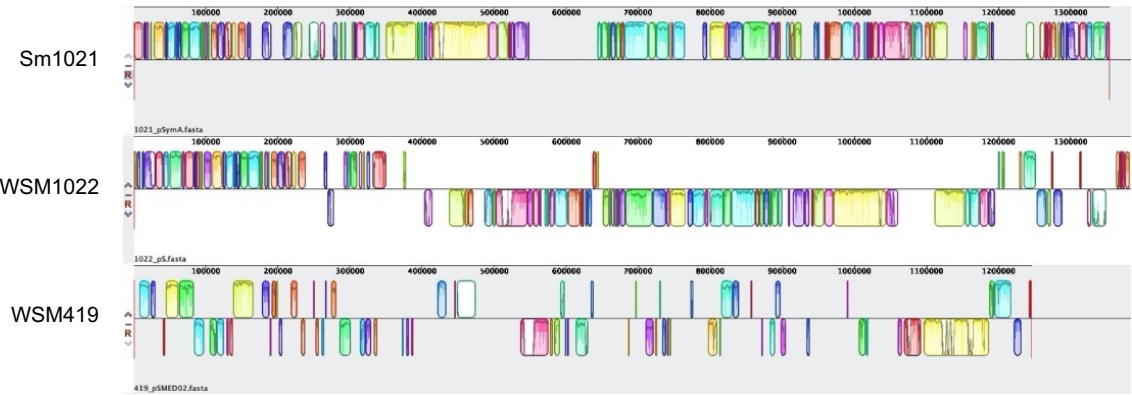

C

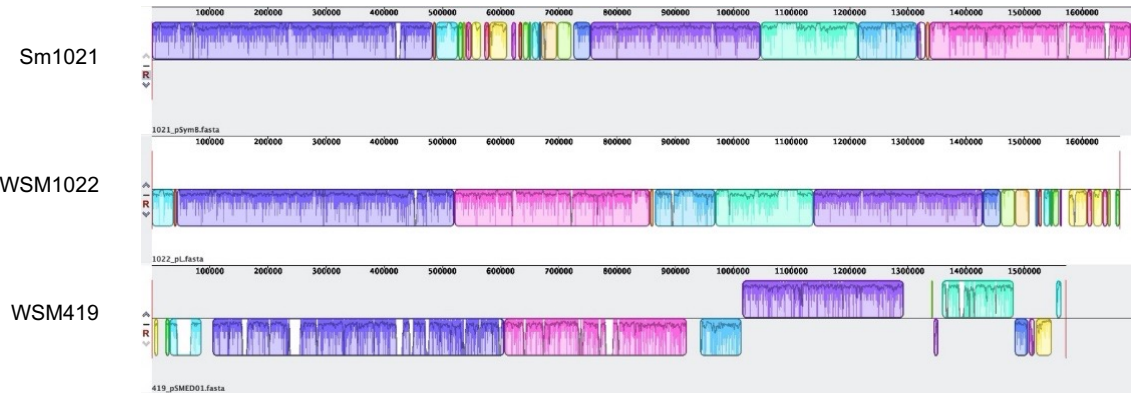

Supplement: s1 [file s1]
